# Supplementary material for: c-di-GMP inhibits the DNA binding activity of H-NS in Salmonella
Source: PubMed Central journal article supplement (PMC10657408; doi:10.1038/s41467-023-43442-5), 2023-11-18
Supplement: 41467_2023_43442_MOESM1_ESM.pdf [file 41467_2023_43442_MOESM1_ESM.pdf]

## Supplementary Information

### **c-di-GMP inhibits the DNA binding activity of H-NS in *Salmonella***

Shuyu Li<sup>1</sup>, Qinmeng Liu<sup>1</sup>, Chongyi Duan<sup>1</sup>, Jialin Li<sup>1</sup>, Hengxi Sun<sup>1</sup>, Lei Xu<sup>1</sup>, Qiao Yang<sup>2,3</sup>, Yao Wang<sup>1</sup>, Xihui Shen<sup>1\*</sup>, Lei Zhang<sup>1\*</sup>

<sup>1</sup>State Key Laboratory of Crop Stress Biology for Arid Areas, Shaanxi Key Laboratory of Agricultural and Environmental Microbiology, College of Life Sciences, Northwest A&F University, Yangling, Shaanxi 712100, China.

<sup>2</sup>ABI Group, College of Marine Science and Technology, Zhejiang Ocean University, Zhoushan 316021, China.

<sup>3</sup>Donghai Laboratory, Zhoushan 316021, China.

\*For correspondence:

Xihui Shen ([xihuishen@nwsuaf.edu.cn](mailto:xihuishen@nwsuaf.edu.cn));

Lei Zhang ([zhanglei0075@nwsuaf.edu.cn](mailto:zhanglei0075@nwsuaf.edu.cn)).

#### **This PDF file includes:**

Supplementary Figures 1-17

Supplementary Tables 1-2

Supplementary References

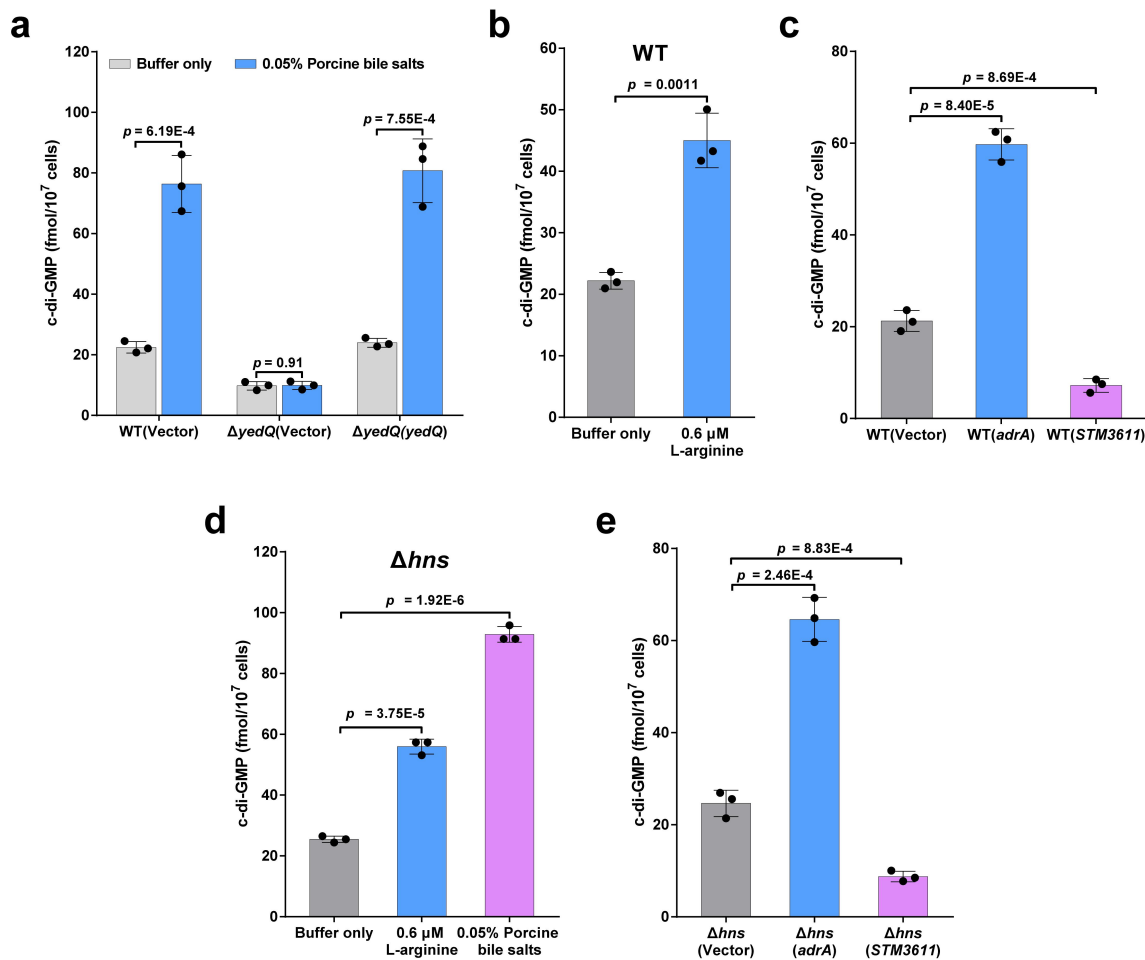

**Supplementary Fig. 1 Intracellular c-di-GMP levels in *S. Typhimurium* are changed by stimulation with L-arginine and bile salts, or by overexpression of *adrA* and *STM3611*.**

**a** An increase in intracellular c-di-GMP concentrations in response to bile salts requires YedQ. **b** L-Arginine stimulates an increase in intracellular c-di-GMP concentrations in the wild type (WT). **c** Intracellular c-di-GMP levels in the wild type were modulated by overexpression of *adrA* or *STM3611*. **d** L-Arginine and bile salts stimulate an increase in intracellular c-di-GMP concentrations in the  $\Delta hns$  mutant. **e** Intracellular c-di-GMP levels in the  $\Delta hns$  mutant were modulated by overexpression of *adrA* or *STM3611*. Data shown are mean  $\pm$  SD of three biological replicates. Statistical significance was calculated using the two-tailed unpaired Student's *t*-test, and  $p < 0.05$  was considered to be statistically significant. Source data are provided as a Source Data file.

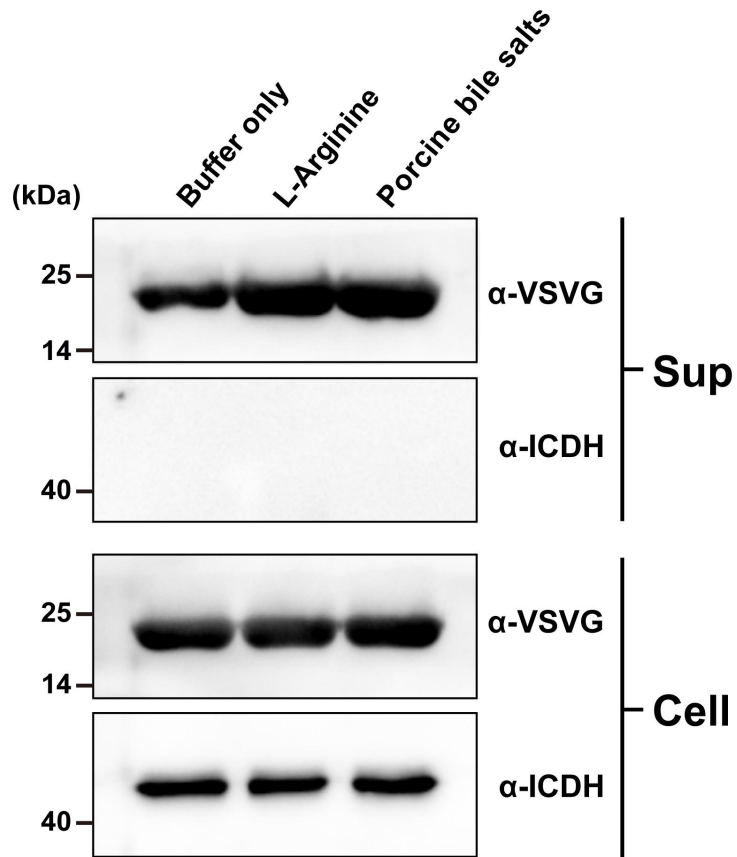

**Supplementary Fig. 2. L-Arginine and bile salts stimulate Hcp1 secretion in *S. Typhimurium* SL1344.**

*S. Typhimurium* SL1344 carrying a plasmid expressing Hcp1-VSVG were induced by 0.6  $\mu$ M L-arginine, 0.05% bile salts or a buffer control, and then Hcp1-VSVG in cell pellet (Cell) and concentrated supernatant (Sup) was analyzed by western blot. ICDH was used as a loading control. Data shown were one representative from three independent experiments with similar results. Source data are provided as a Source Data file.

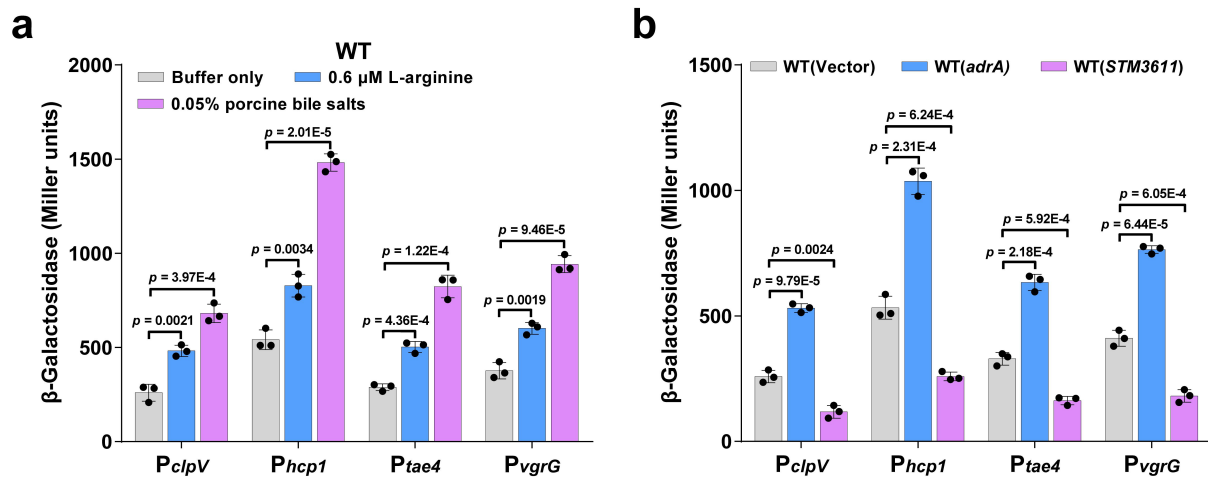

**Supplementary Fig. 3. Elevated c-di-GMP levels induce the promoter activities of T6SS genes in *S. Typhimurium* SL1344.**

**a** The promoter activities of *clpV*, *hcp1*, *tae4* and *vgrG* in the wild-type strain were induced by L-arginine or bile salts. **b** The promoter activities of the T6SS genes in the wild type (WT) were upregulated by overexpressing *adrA*, but downregulated by overexpressing *STM3611*. Data shown are mean ± SD of three biological replicates. Statistical significance was calculated using the two-tailed unpaired Student's *t*-test. *P* values < 0.05 indicate significant differences. Source data are provided as a Source Data file.

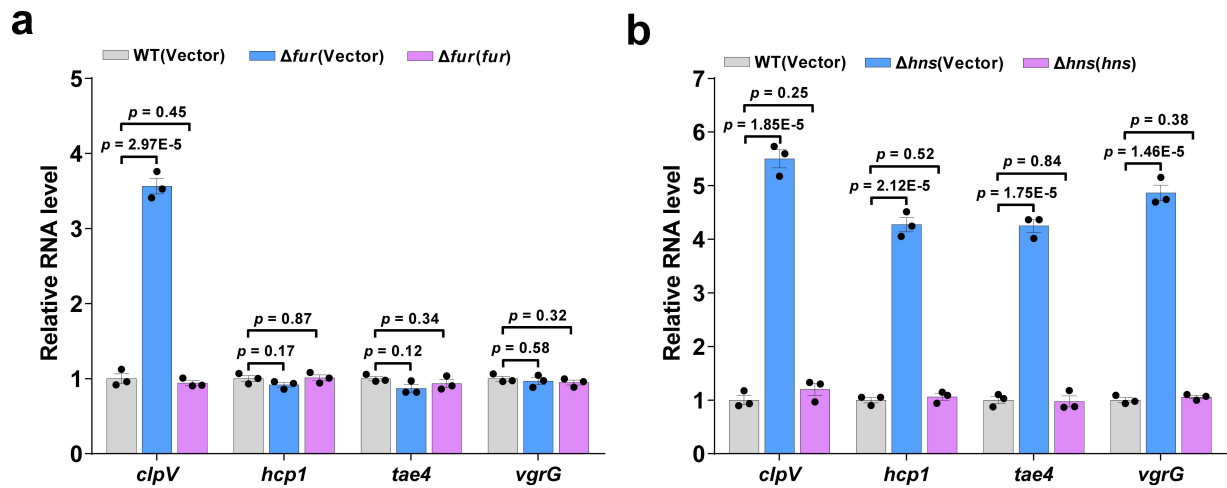

**Supplementary Fig. 4. T6SS gene expression in *S. Typhimurium* wild type, mutants, and the corresponding complemented strains.**

**a** qRT-PCR analysis of T6SS gene expression in *S. Typhimurium* wild type (WT), the  $\Delta fur$  mutant and its complemented strain. **b** qRT-PCR analysis of T6SS gene expression in *S. Typhimurium* wild type, the  $\Delta hns$  mutant and its complemented strain. Gene expression levels were normalized to 16S rRNA and presented as values relative to that of the wild type. Data are mean  $\pm$  SD of three biological replicates. *P* values < 0.05 indicate significant differences (two-tailed unpaired Student's *t* test). Source data are provided as a Source Data file.

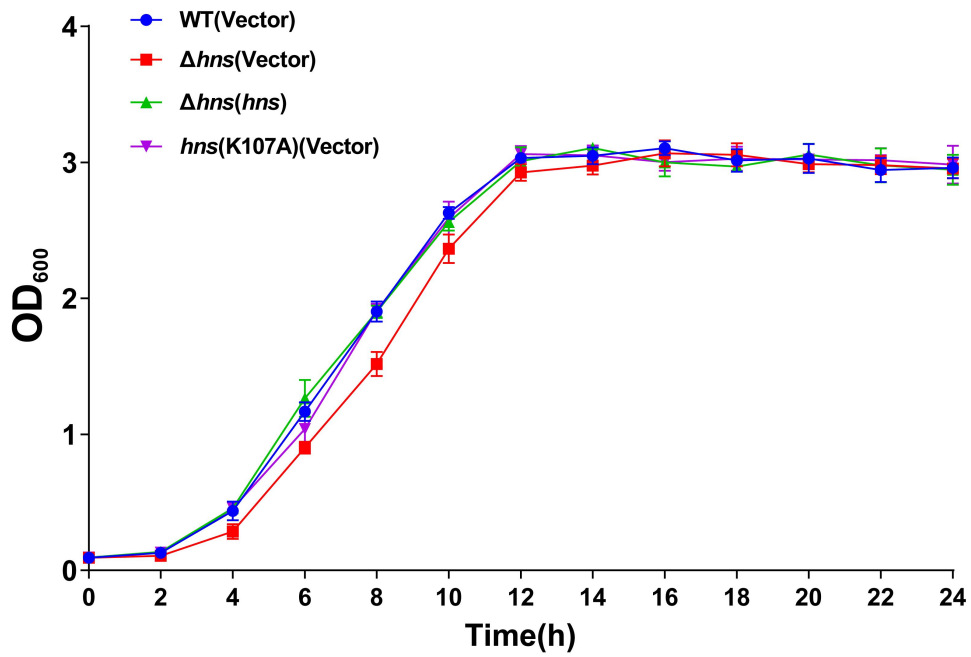

**Supplementary Fig. 5. Growth curves of *S. Typhimurium* strains.**

*S. Typhimurium* strains were grown in LB medium with shaking at 37 °C. 0.5 mM IPTG was added as an inducer at the time of inoculation. At each time point during growth, cell density was recorded by measuring the optical density at 600 nm. Data are mean  $\pm$  SD of three biological replicates. WT, wild type. Source data are provided as a Source Data file.

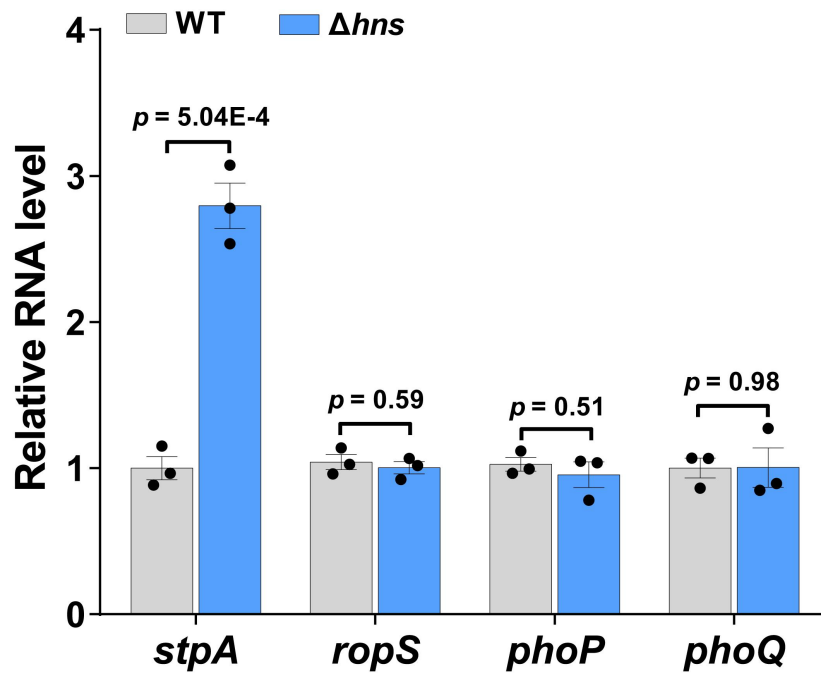

**Supplementary Fig. 6. Expression of *stpA*, but not *ropS* or the *phoPQ* operon, was altered in  $\Delta hns$  compared to the wild type.**

qRT-PCR analysis of gene expression in *S. Typhimurium* wild type (WT) and the  $\Delta hns$  mutant. Gene expression levels were normalized to 16S rRNA and presented as values relative to that of the wild type. Data are mean  $\pm$  SD of three biological replicates.  $P < 0.05$  indicates that the difference is statistically significant (two-tailed unpaired Student's *t*-test). Source data are provided as a Source Data file.

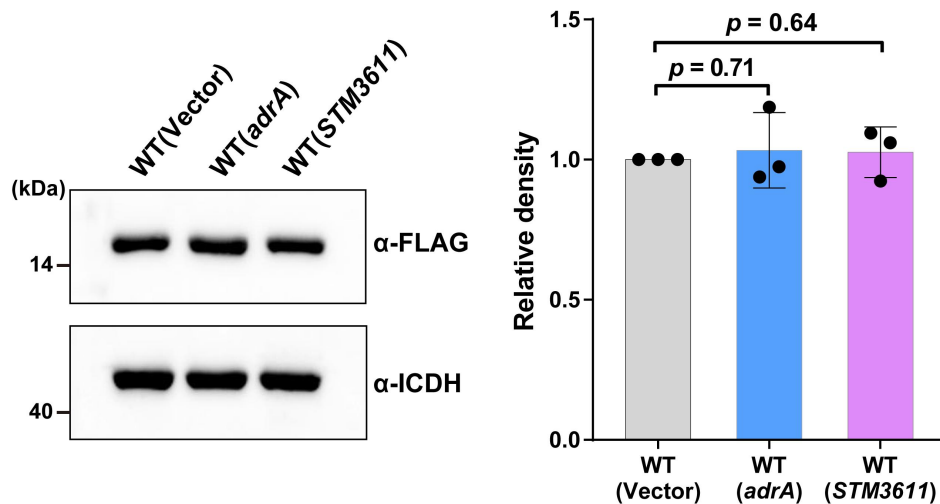

**Supplementary Fig. 7. The production of H-NS in *S. Typhimurium* wild type is not affected by overexpression of *adrA* or *STM3611*.**

The plasmid pBBR1MCS1 and its derivatives harboring *adrA* or *STM3611* were separately transformed into the wild-type (WT) strain expressing *in situ* tagged FLAG-H-NS, and the production of H-NS in cells were assessed by western blot analysis with anti-FLAG antibody. The blots shown are representative of three independent experiments with similar results. The band intensities were quantified by scanning densitometry using ImageJ (NIH, USA), normalized to intracellular ICDH, and presented as values relative to that of the wild type without gene overexpression (mean  $\pm$  SD;  $n = 3$  independent experiments). Differences were considered to be statistically significant when  $p$  values were less than 0.05 (two-tailed unpaired Student's *t*-test). Source data are provided as a Source Data file.



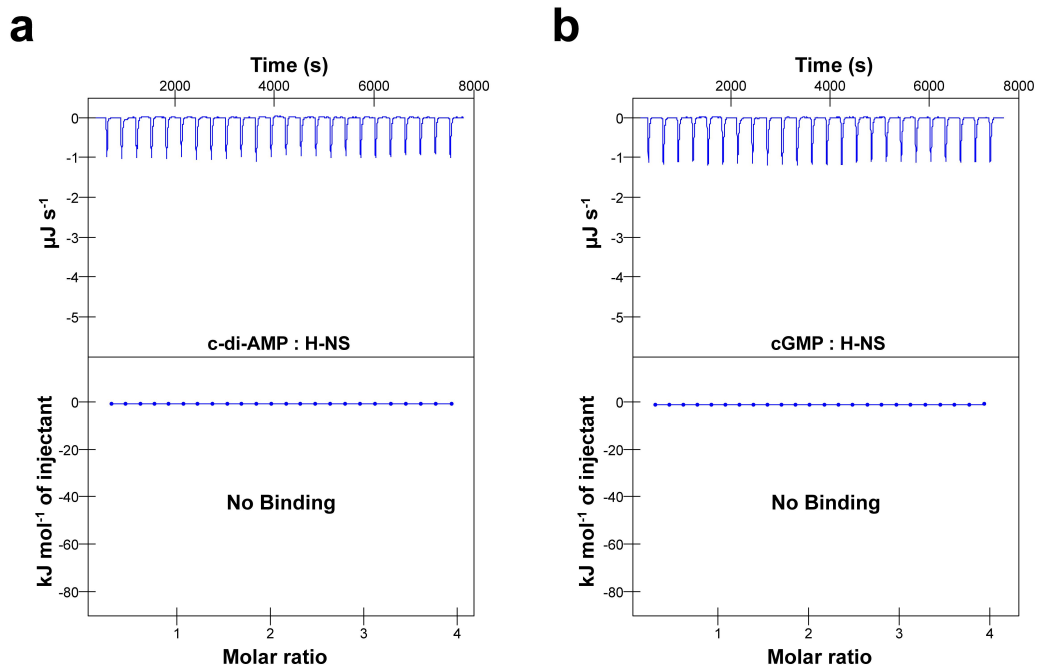

**Supplementary Fig. 8. Isotherms representing binding of the H-NS protein of *S. Typhimurium* with c-di-AMP or cGMP, as measured by ITC.**

**a, b** ITC data and plots of injected heat for injections of 100  $\mu\text{M}$  c-di-AMP (**a**) or cGMP (**b**) into the sample cell containing 10  $\mu\text{M}$  H-NS are shown in the upper and lower plots, respectively. The heats of ligand dilution were subtracted and the corrected data were fit to a one-site binding model by using the NanoAnalyze software. Isotherms shown are one representative of three independent experiments with similar results.

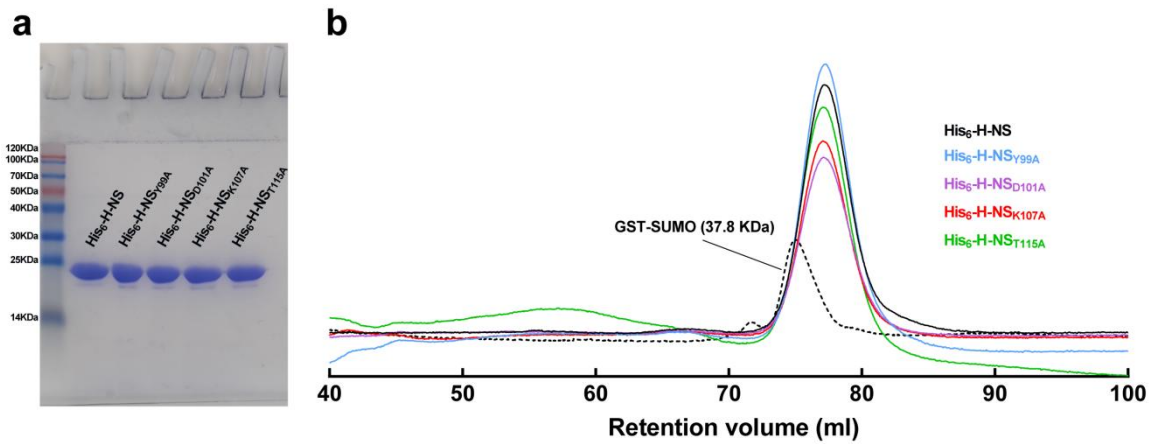

**Supplementary Fig. 9. SDS-PAGE and SEC elution profiles of H-NS and its variants.**

**a** An SDS-PAGE gel displaying purified H-NS and its variants. H-NS and its variants with an N-terminal His<sub>6</sub> tag were purified by Ni<sup>2+</sup>-NTA affinity chromatography and then subjected to SDS-PAGE analysis. Similar results were obtained in three independent experiments. **b** SEC elution profiles of H-NS and its variants. After being concentrated, the purified H-NS and its variants were subjected to SEC using an ÄKTA Purifier FPLC system. The GST-SUMO fusion protein was used as the molecular weight standards. SEC analysis showed that purified recombinant H-NS and its variants had formed homodimers in solution. Data reproduced in three independent experiments. Source data are provided as a Source Data file.

**a**

**H-NS 91** AARPAKYSYVDENGETKTWTGQGRTPAVIKKAMEE **125**  
**StpA 90** QPRPAKYRFTDFNGEEKTWTGQGRTPKPIAQALAA **124**

**b**

Binding affinity for c-di-GMP

| <b>StpA</b> | <b><math>K_d</math> (<math>\mu\text{M}</math>)</b> |
|-------------|----------------------------------------------------|
| WT          | $73 \pm 14$                                        |
| F98Y        | $0.64 \pm 0.09$                                    |

**Supplementary Fig. 10. StpA is a closely-related paralogue of H-NS but shows very low binding affinity for c-di-GMP.**

**a** Sequence alignment of H-NS and its paralogue StpA in *S. Typhimurium*. Four key residues of H-NS involved in interactions with c-di-GMP are highlighted in yellow. The three conserved residues of StpA corresponding to D101, K107 and T115 of H-NS are highlighted in yellow, and the non-conserved residue corresponding to Y99 is highlighted in purple. **b** Binding of c-di-GMP to wild-type (WT) StpA and the F98Y variant. The binding affinity was evaluated by ITC analysis. The  $K_d$  values are presented as mean  $\pm$  SD of three independent experiments. Source data are provided as a Source Data file.

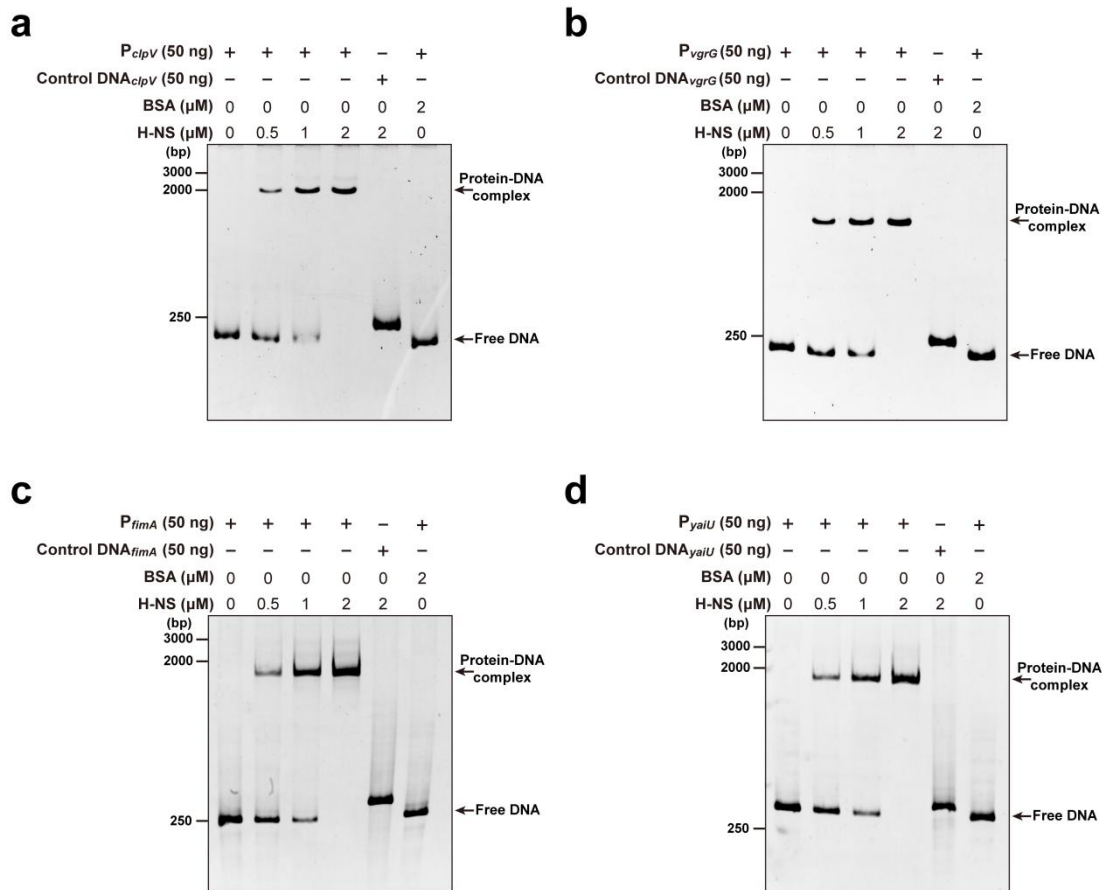

**Supplementary Fig. 11. EMSAs demonstrating specificity of H-NS binding to promoters of *clpV*, *vgrG*, *fimA* and *yaiU*.**

**a-d** 50 ng of DNA of  $P_{clpV}$  (**a**),  $P_{vgrG}$  (**b**),  $P_{fimA}$  (**c**) or  $P_{yaiU}$  (**d**) (the average AT content of each promoter sequence is above 57.9%) was incubated with H-NS (the concentrations are noted in the panel) in a 20- $\mu$ l reaction system. DNA fragments amplified from the coding regions of the corresponding genes were used as DNA negative controls (the average AT content of each control sequence is below 43.6%) and BSA was used as the protein control. Gels shown are one representative of three independent experiments with similar results. Source data are provided as a Source Data file.



**a**

Binding affinity for FLAG–H-NS

| Nucleotides/<br>DNA probes | $K_d$ ( $\mu\text{M}$ ) |
|----------------------------|-------------------------|
| c-di-GMP                   | $0.29 \pm 0.06$         |
| $P_{clpV}$                 | $0.36 \pm 0.04$         |
| $P_{vgrG}$                 | $0.48 \pm 0.08$         |
| $P_{fimA}$                 | $0.32 \pm 0.06$         |
| $P_{yaiU}$                 | $0.31 \pm 0.09$         |

**b**Binding affinity for H-NS<sub>T115A</sub>

| DNA probes | $K_d$ ( $\mu\text{M}$ ) |
|------------|-------------------------|
| $P_{clpV}$ | $27 \pm 8$              |
| $P_{vgrG}$ | $18 \pm 5$              |

**Supplementary Fig. 13. FLAG-H-NS maintains unaffected c-di-GMP- and DNA-binding activity while H-NS<sub>T115A</sub> showed dramatically reduced DNA-binding activity.**

**a** Binding of FLAG-H-NS for c-di-GMP or its target gene promoters. **b** Binding of H-NS<sub>T115A</sub> for the promoter sequences of *clpV* and *vgrG*. The binding affinity was measured by ITC, and the  $K_d$  values were presented as mean  $\pm$  SD of three independent experiments. Source data are provided as a Source Data file.

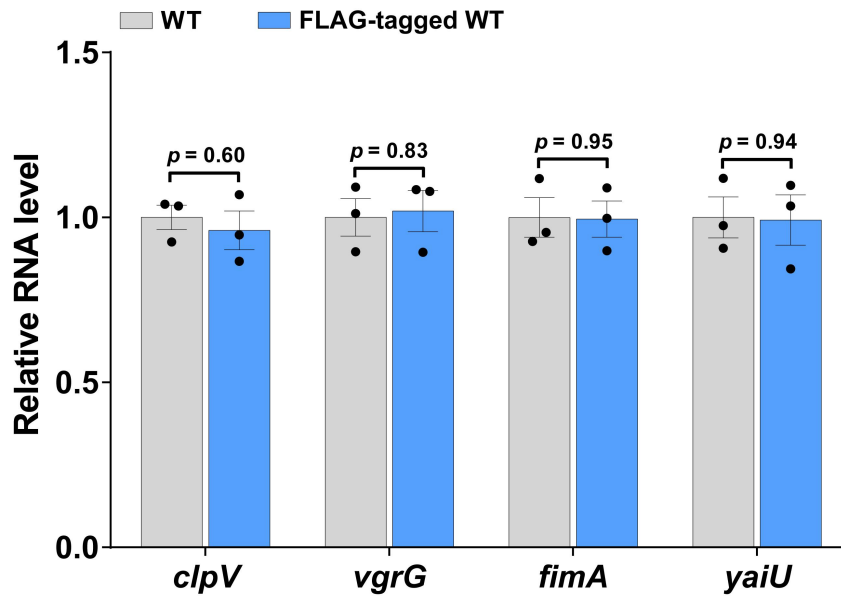

**Supplementary Fig. 14. The mRNA levels of the four H-NS-repressed genes are not altered by the presence of the FLAG tag.**

qRT-PCR analysis of the expression of the four H-NS-repressed genes in FLAG-tagged and untagged wild-type (WT) *S. Typhimurium*. Gene expression levels were normalized to 16S rRNA and presented as values relative to that of the untagged wild type. Data are mean  $\pm$  SD of three biological replicates. Statistical significance was calculated using the two-tailed unpaired Student's *t*-test, and differences were considered to be statistically significant when *p* values were less than 0.05. Source data are provided as a Source Data file.

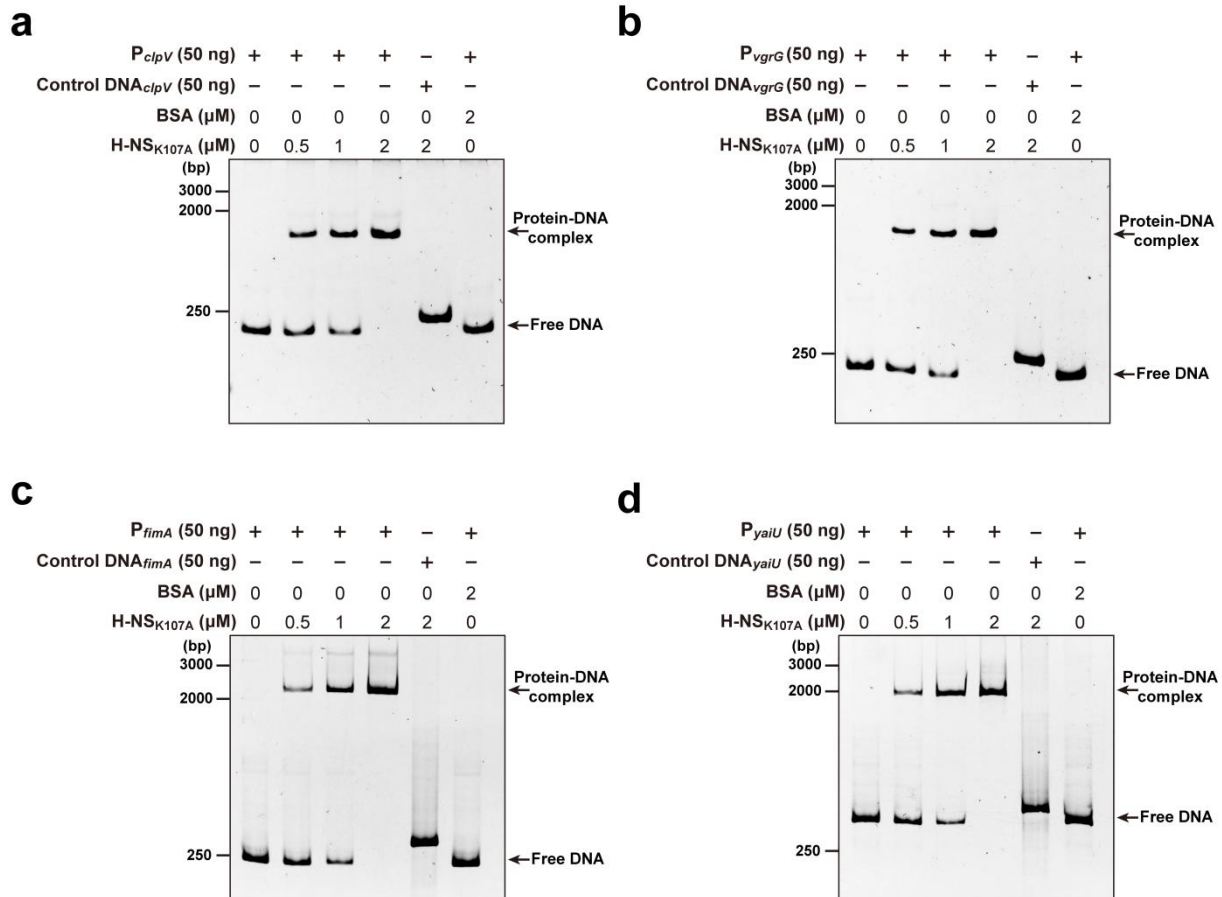

**Supplementary Fig. 15. EMSAs demonstrating specificity of H-NS<sub>K107A</sub> binding to promoters of *clpV*, *vgrG*, *fimA* and *yaiU*.**

**a-d** 50 ng of DNA of  $P_{clpV}$  (**a**),  $P_{vgrG}$  (**b**),  $P_{fimA}$  (**c**) or  $P_{yaiU}$  (**d**) was incubated with H-NS<sub>K107A</sub> (the concentrations are noted in the panel) in a 20- $\mu$ l reaction system. DNA fragments amplified from the coding regions of the corresponding genes were used as DNA negative controls and BSA was used as the protein control. Gels shown are one representative of three independent experiments with similar results. Source data are provided as a Source Data file.



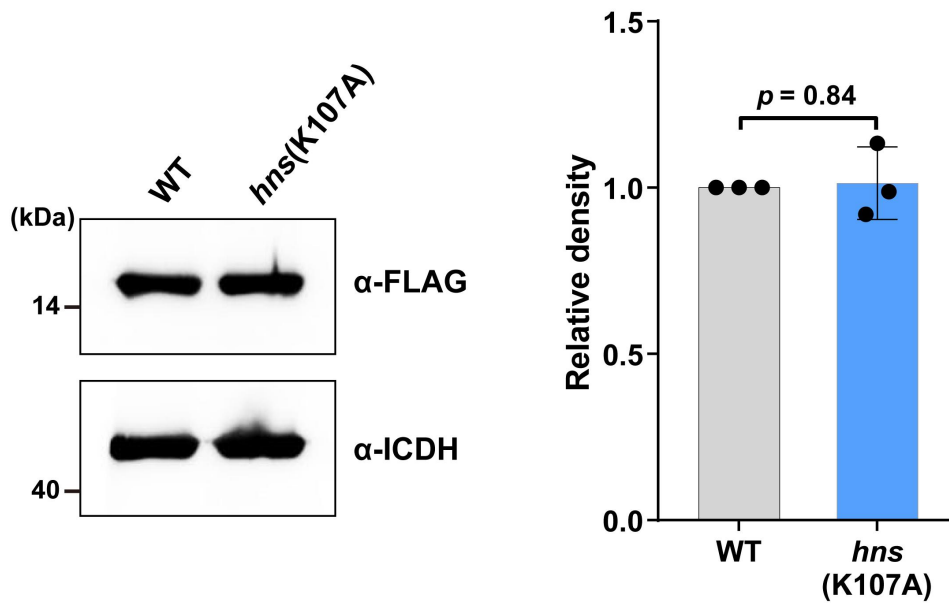

**Supplementary Fig. 16. The K107A substitution in H-NS did not affect the abundance of the protein in *S. Typhimurium*.**

Western blot analysis of intracellular accumulation of H-NS and H-NS<sub>K107A</sub> in the wild type (WT) and the *hns(K107A)* mutant with a FLAG tag fused to the N terminus of the *hns/hns(K107A)* gene in the chromosome. The blots shown are representative of three independent experiments with similar results. The band intensities were quantified by scanning densitometry using ImageJ (NIH, USA), normalized to intracellular ICDH, and presented as values relative to that of the wild type (mean  $\pm$  SD;  $n = 3$  independent experiments). Differences were considered to be statistically significant when  $p$  values were less than 0.05 (two-tailed unpaired Student's  $t$ -test). Source data are provided as a Source Data file.

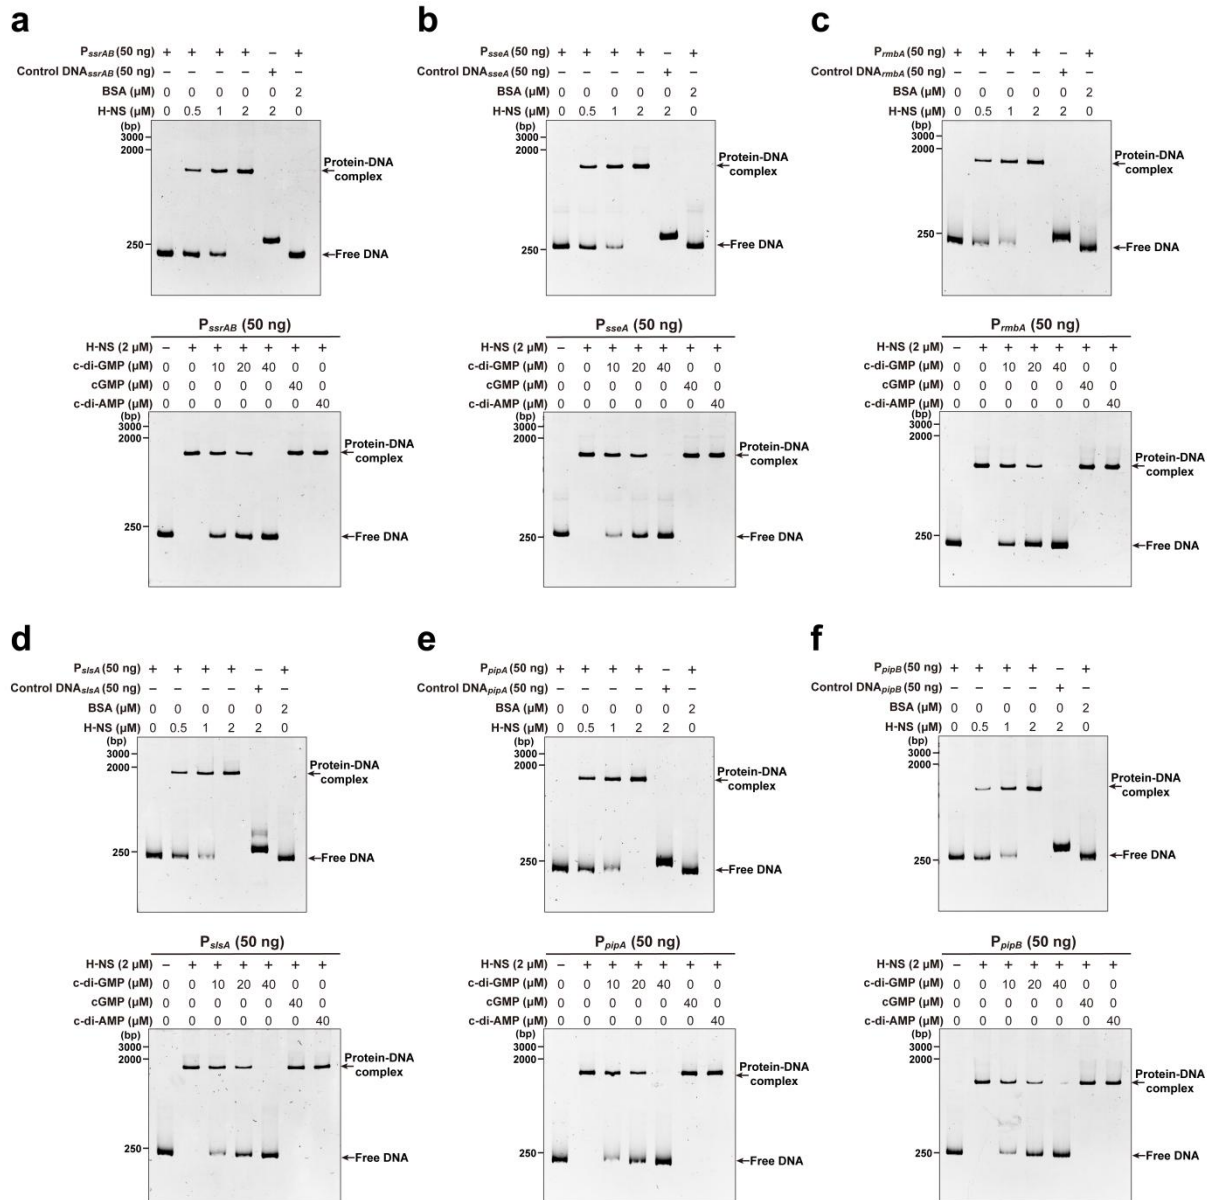

**Supplementary Fig. 17. Specific binding of H-NS to the promoters of the target genes or operons within SPI-2, SPI-3 and SPI-5 is inhibited by c-di-GMP.**

**a-f** EMSA assays show that H-NS specifically binds to the promoter sequences of *ssrAB* (a), *sseA* (b), *rmbA* (c), *slsA* (d), *pipA* (e) or *pipB* (f) (top), and the binding is impaired by c-di-GMP in a dose-dependent fashion (bottom). DNA fragments amplified from the coding regions of the corresponding genes or operons were used as DNA negative controls and BSA was used as the protein control (a-f, top). The average AT content of each promoter sequence is above 56.1%, while the average AT content of each DNA negative control is below 44.8%. Gels shown are one representative of three independent experiments with similar results. Source data are provided as a Source Data file.

## Supplementary Tables

**Table S1. Bacterial strains and plasmids used in this study.**

| Strains and plasmids                         | Relevant characteristics*                                                                                      | Source           |
|----------------------------------------------|----------------------------------------------------------------------------------------------------------------|------------------|
| <b>Strains</b>                               |                                                                                                                |                  |
| <b>S. Typhimurium</b>                        |                                                                                                                |                  |
| SL1344                                       | Wild-type                                                                                                      | Laboratory stock |
| $\Delta yedQ$                                | <i>yedQ</i> deletion mutant in SL1344                                                                          | 1                |
| $\Delta fur$                                 | <i>fur</i> deletion mutant in SL1344                                                                           | This study       |
| $\Delta hns$                                 | <i>hns</i> deletion mutant in SL1344                                                                           | This study       |
| $\Delta clpV$                                | <i>clpV</i> double deletion mutant in SL1344                                                                   | This study       |
| <i>hns</i> (K107A)                           | SL1344 Wild-type strain with the K107A mutation of <i>hns</i>                                                  | This study       |
| FLAG- <i>hns</i>                             | SL1344 Wild-type strain expressing in <i>situ</i> tagged FLAG-H-NS                                             | This study       |
| FLAG- <i>hns</i> <sub>K107A</sub>            | SL1344 Wild-type strain expressing in <i>situ</i> tagged FLAG-H-NS <sub>K107A</sub>                            | This study       |
| <b>E. coli</b>                               |                                                                                                                |                  |
| BL21(DE3)                                    | Host for expression vector pET-28a                                                                             | Novagen          |
| TG1                                          | Host for cloning                                                                                               | Stratagene       |
| S17-1 $\lambda$ pir                          | $\lambda$ -pir lysogen of S17-1, F- <i>thi pro hsdR</i> [RP4-2 Tc::Mu Km::Tn7 (Tp Sm)]                         | 2                |
| <b>Plasmids</b>                              |                                                                                                                |                  |
| pCas                                         | Crispr-Cas9 system plasmid used for in-frame deletion, Km <sup>r</sup>                                         | 3                |
| pTargetF1                                    | pTargetF with the spectinomycin resistance gene replaced by a chloramphenicol resistance gene, Cm <sup>r</sup> | 4                |
| pTargetF1- $\Delta yedQ$                     | pTargetF1 derivative for <i>yedQ</i> deletion in SL1344                                                        | This study       |
| pTargetF1- $\Delta fur$                      | pTargetF1 derivative for <i>fur</i> deletion in SL1344                                                         | This study       |
| pTargetF1- $\Delta hns$                      | pTargetF1 derivative for <i>hns</i> deletion in SL1344                                                         | This study       |
| pTargetF1- $\Delta clpV$                     | pTargetF1 derivative for <i>clpV</i> deletion in SL1344                                                        | This study       |
| pTargetF1- <i>hns</i> (K107A)                | pTargetF1 derivative for the K107A mutation of <i>hns</i> in SL1344                                            | This study       |
| pTargetF1-FLAG- <i>hns</i>                   | pTargetF1 derivative for in <i>situ</i> tagged FLAG-H-NS and FLAG-H-NS <sub>K107A</sub> in SL1344              | This study       |
| pDM4                                         | Suicide vector, <i>mobRK2</i> , <i>oriR6K</i> , <i>pir</i> , <i>sacB</i> , Cm <sup>r</sup>                     | 6                |
| pDM4- <i>lacZ</i>                            | pDM4 derivative with a promoterless <i>lacZ</i> gene inserted into the multiple cloning site                   | 1                |
| pDM4-P <sub><i>clpV</i></sub> :: <i>lacZ</i> | pDM4 derivative for <i>clpV</i> promoter fusion                                                                | This study       |
| pDM4-P <sub><i>hcp1</i></sub> :: <i>lacZ</i> | pDM4 derivative for <i>hcp1</i> promoter fusion                                                                | This study       |
| pDM4-P <sub><i>tae4</i></sub> :: <i>lacZ</i> | pDM4 derivative for <i>tae4</i> promoter fusion                                                                | This study       |
| pDM4-P <sub><i>vgrG</i></sub> :: <i>lacZ</i> | pDM4 derivative for <i>vgrG</i> promoter fusion                                                                | This study       |
| pKT100                                       | Cloning vector, p15A replicon, Km <sup>r</sup>                                                                 | 7                |
| pKT100- <i>hcp1</i> -VSVG                    | pKT100 expressing <i>hcp1</i> with a C-terminal VSVG tag                                                       | This study       |

|                                     |                                                                               |            |
|-------------------------------------|-------------------------------------------------------------------------------|------------|
| pBBR1MCS1                           | Cloning vector containing REP, Cm <sup>r</sup>                                | 8          |
| pBBR1MCS1- <i>hns</i>               | <i>hns</i> cloned into pBBR1MCS1 for complementation                          | This study |
| pBBR1MCS1- <i>fur</i>               | <i>fur</i> cloned into pBBR1MCS1 for complementation                          | This study |
| pBBR1MCS1- <i>adrA</i>              | pBBR1MCS1 expressing <i>adrA</i>                                              | This study |
| pBBR1MCS1- <i>STM3611</i>           | pBBR1MCS1 expressing <i>STM3611</i>                                           | This study |
| pBBR1MCS1- <i>yedQ</i>              | pBBR1MCS1 expressing <i>yedQ</i>                                              | This study |
| pBBR1MCS1-FLAG- <i>hns</i>          | pBBR1MCS1 expressing FLAG-H-NS                                                | This study |
| pET-28a                             | Expression vector with N-terminal hexahistidine affinity tag, Km <sup>r</sup> | Novagen    |
| pET28a- <i>ycgR</i>                 | pET-28a expressing <i>ycgR</i>                                                | This study |
| pET28a- <i>invF</i>                 | pET-28a expressing <i>invF</i>                                                | 1          |
| pET28a- <i>stpA</i>                 | pET-28a expressing <i>stpA</i>                                                | This study |
| pET28a- <i>stpA</i> <sup>F98Y</sup> | pET-28a expressing <i>stpA</i> <sup>F98Y</sup>                                | This study |
| pET28a- <i>hns</i>                  | pET-28a expressing <i>hns</i>                                                 | This study |
| pET28a- <i>hns</i> <sub>Ctd</sub>   | pET-28a expressing <i>hns</i> <sub>Ctd</sub>                                  | This study |
| pET28a- <i>hns</i> <sup>Y99A</sup>  | pET-28a expressing <i>hns</i> <sup>Y99A</sup>                                 | This study |
| pET28a- <i>hns</i> <sup>D101A</sup> | pET-28a expressing <i>hns</i> <sup>D101A</sup>                                | This study |
| pET28a- <i>hns</i> <sup>K107A</sup> | pET-28a expressing <i>hns</i> <sup>K107A</sup>                                | This study |
| pET28a- <i>hns</i> <sup>T115A</sup> | pET-28a expressing <i>hns</i> <sup>T115A</sup>                                | This study |

---

**\*Km<sup>r</sup> and Cm<sup>r</sup> represent resistance to kanamycin and chloramphenicol, respectively.**

**Table S2. Primers used in this study.**

| Primers               | 5'-3' sequence*                                                            |                                         |  |
|-----------------------|----------------------------------------------------------------------------|-----------------------------------------|--|
| $\Delta fur$ -sg20-F  | AGCTAGCTCAGTCCTAGGTATAATACTAGTCATCTTATC<br>TGCCTTGATTGGTTTTAGAGCTAGAAATAGC |                                         |  |
| $\Delta fur$ -sg20-R  | CCGAGTCGGTGCTTTTTTTGAAGCCACGATTGTGGGTC<br>A                                |                                         |  |
| $\Delta fur$ -up-F    | TGCGGTATTGTTGTCAGTCA                                                       | To generate<br>pTargetF1- $\Delta fur$  |  |
| $\Delta fur$ -up-R    | AAATCTCCAGTTGCTTACCTTAAGTGCTTCGCTCATTG<br>TAGTA                            |                                         |  |
| $\Delta fur$ -down-F  | TGACTGACAACAATACCGCATCACAGCCTCTATCTTTAC<br>GG                              |                                         |  |
| $\Delta fur$ -down-R  | GGTAATAGATCTAAGCTTCTGCAGGTCGACCGGACATC<br>GGCATAGTTTT                      |                                         |  |
| $\Delta hns$ -sg20-F  | AGCTAGCTCAGTCCTAGGTATAATACTAGTAAGCGCTG<br>CTGCTGCTGAAGGTTTTAGAGCTAGAAATAGC |                                         |  |
| $\Delta hns$ -sg20-R  | GGGTGATGATAAGCATTGTTGTTCAAAAAAAGCACCGA<br>CTCGG                            |                                         |  |
| $\Delta hns$ -up-F    | CCGAGTCGGTGCTTTTTTTGAACAACAATGCTTATCATC<br>ACCC                            | To generate<br>pTargetF1- $\Delta hns$  |  |
| $\Delta hns$ -up-R    | AAATCTCCAGTTGCTTACCTTAAGTGCTTCGCTCATTG<br>TAGTA                            |                                         |  |
| $\Delta hns$ -down-F  | TACTACAATGAGCGAAGCACTTAAGGTAAGCAACTGGA<br>AGATTT                           |                                         |  |
| $\Delta hns$ -down-R  | GGTAATAGATCTAAGCTTCTGCAGGTCGACTTGTCTGGG<br>CGTTATGTGT                      |                                         |  |
| $\Delta clpV$ -sg20-F | AGCTAGCTCAGTCCTAGGTATAATACTAGTTGTTGCAGA<br>TTGCCGAACCGTTTTAGAGCTAGAAATAGC  |                                         |  |
| $\Delta clpV$ -sg20-R | GGGTGATGATAAGCATTGTTGTTCAAAAAAAGCACCGA<br>CTCGG                            |                                         |  |
| $\Delta clpV$ -up-F   | CCGAGTCGGTGCTTTTTTTGAACTGCGACTGTATTTTCC<br>GTA                             | To generate<br>pTargetF1- $\Delta clpV$ |  |
| $\Delta clpV$ -up-R   | GTCGTGGCAGAATGTGCTGGGATTAGAGCGTAGTTTGC                                     |                                         |  |
| $\Delta clpV$ -down-F | GCAAACACTACGCTCTAATCCCAGCACATTCTGCCACGAC                                   |                                         |  |
| $\Delta clpV$ -down-R | GGTAATAGATCTAAGCTTCTGCAGGTCGACTCAGCGTA<br>TTCGGCACAG                       |                                         |  |
| $hns(K107A)$ -sg20-F  | AGCTAGCTCAGTCCTAGGTATAATACTAGTTGTATCCGC<br>TTCTGTTCCCGTTTTAGAGCTAGAAATAGC  |                                         |  |
| $hns(K107A)$ -sg20-R  | GCCAAAAAGTAAAGTCACCAGTTCAAAAAAAGCACCGA<br>CTCGG                            |                                         |  |
| $hns(K107A)$ -up-F    | CCGAGTCGGTGCTTTTTTTGAACTGGTGACTTTACTTTT<br>TGGC                            | To generate<br>pTargetF1- $hns(K107A)$  |  |
| $hns(K107A)$ -up-R    | TATCCGCAGACTTTAGCCATCGCCTGTTCAACCGCT                                       |                                         |  |
| $hns(K107A)$ -down-F  | AGCGTTGAACAGGCGATGGCTAAAGTCTGCGGATA                                        |                                         |  |
| $hns(K107A)$ -down-R  | GGTAATAGATCTAAGCTTCTGCAGGTCGACAAGTGATT                                     |                                         |  |

|                                  |                                                                                                           |                                                               |
|----------------------------------|-----------------------------------------------------------------------------------------------------------|---------------------------------------------------------------|
|                                  | GCTGAGCCGAT                                                                                               |                                                               |
| FLAG- <i>hns</i> -sg20-F         | AGCTAGCTCAGTCCCTAGGTATAA <u>ACTAGT</u> CATCCGTACT<br>CTTCGTGCGCGTTTTAGAGCTAGAAATAGC                       |                                                               |
| FLAG- <i>hns</i> -sg20-R         | TGCAATGAGATCGTATTTTCATCTTCAAAAAAAGCACCGAC<br>TCGG                                                         |                                                               |
| FLAG- <i>hns</i> -up-F           | CCGAGTCGGTGCTTTTTTTGAATGCAATGAGATCGTATTT<br>CATC                                                          | To generate                                                   |
| FLAG- <i>hns</i> -up-R           | CTTATCGTCGTCCTTGTAAATCCATTGTAGTAATCTCAAAC<br>TTATA                                                        | pTargetF1-FLAG- <i>hns</i>                                    |
| FLAG- <i>hns</i> -down-F         | ATGGATTACAAGGACGACGATAAGATGAGCGAAGCACTT<br>AAAATTCT                                                       |                                                               |
| FLAG- <i>hns</i> -down-R         | GGTAATAGATCTAAGCTTCTGCAG <u>GTCGACT</u> TAGCGGCA<br>GCCATGCTATTCA                                         |                                                               |
| <i>P<sub>clpV</sub>::lacZ</i> -F | ACGCG <u>TGAC</u> ATGTTGCTCAAAAAGCGGAA                                                                    | To generate                                                   |
| <i>P<sub>clpV</sub>::lacZ</i> -R | CTAGTCTAGAAAGTTTCCATGTGTTATGCCTTGT                                                                        | pDM4- <i>P<sub>clpV</sub>::lacZ</i>                           |
| <i>P<sub>hcp1</sub>::lacZ</i> -F | ACGCG <u>TGACT</u> CGCTATTGGGTTTCGTGTA                                                                    | To generate                                                   |
| <i>P<sub>hcp1</sub>::lacZ</i> -R | CTAGTCTAGAGTCATAAGCCATTTTTATATCCTTA                                                                       | pDM4- <i>P<sub>hcp1</sub>::lacZ</i>                           |
| <i>P<sub>tae4</sub>::lacZ</i> -F | ACGCG <u>TGAC</u> GATTGTCGCCGTGGTTTC                                                                      | To generate                                                   |
| <i>P<sub>tae4</sub>::lacZ</i> -R | CTAGTCTAGATCTGTTTCAATTTGCTTAACCTCTA                                                                       | pDM4- <i>P<sub>tae4</sub>::lacZ</i>                           |
| <i>P<sub>vgrG</sub>::lacZ</i> -F | ACGCG <u>TGACT</u> GGTGA <sup>AAA</sup> AGACATTTACGGTT                                                    | To generate                                                   |
| <i>P<sub>vgrG</sub>::lacZ</i> -R | CTAGTCTAGATACAAAACCATGGTAGTGACTCCT                                                                        | pDM4- <i>P<sub>vgrG</sub>::lacZ</i>                           |
| <i>hcp1</i> -F                   | GACGACAAGCTTACTAGTCTGCAG <u>GGATCC</u> ATGGCTTA<br>TGACATTTTTTTGAA                                        | To generate                                                   |
| <i>hcp1</i> -VSVG-R              | ATCTTAGTTACTTAGGTACCCGGGGT <u>CGACT</u> TATTTTCC<br>TAATCTATTCATTTCAATATCTGTATAAAATTTCTTTGTTGG<br>CCTTGAA | pKT100- <i>hcp1</i> -VSVG                                     |
| <i>Chns</i> -F                   | GACGGTATCGATAAGCTTGATATCGA <u>ATTC</u> ATGAGCGAA<br>GCACTTAAAATTCT                                        | To generate                                                   |
| <i>Chns</i> -R                   | GGTGGCGGCCGCTCTAGAACTAGTGGATCCTTATTCCT<br>TGATCAGGAAATCTTC                                                | pBBR1MCS1- <i>hns</i>                                         |
| <i>Cfur</i> -F                   | GACGGTATCGATAAGCTTGATATCGA <u>ATTC</u> ATGACTGAC<br>AACAATACCGCA                                          | To generate                                                   |
| <i>Cfur</i> -R                   | GGTGGCGGCCGCTCTAGAACTAGTGGATCCTTATTTAG<br>TCGCGTCATCGTG                                                   | pBBR1MCS1- <i>fur</i>                                         |
| <i>adrA</i> -F                   | GACGGTATCGATAAGCTTGATATCGA <u>ATTC</u> ATGTTCCCA<br>AAAATAATGAATGAT                                       | To generate                                                   |
| <i>adrA</i> -R                   | GGTGGCGGCCGCTCTAGAACTAGTGGATCCTCATGCC<br>GCCACTTCG                                                        | pBBR1MCS1- <i>adrA</i><br>and<br>pBBR1MCS5- <i>adrA</i>       |
| <i>STM3611</i> -F                | GACGGTATCGATAAGCTTGATATCGA <u>ATTC</u> ATGATAAAG<br>CAGGTTATCCAGC                                         | To generate                                                   |
| <i>STM3611</i> -R                | GGTGGCGGCCGCTCTAGAACTAGTGGATCCTTACAGG<br>GTCAGAATCACCTCT                                                  | pBBR1MCS1- <i>STM3611</i><br>and<br>pBBR1MCS5- <i>STM3611</i> |
| FLAG- <i>hns</i> -F              | GACGGTATCGATAAGCTTGATATCGA <u>ATTC</u> ATGGATTAC<br>AAGGACGACGATGACAAGAGCGAAGCACTTAAAATTCT                | To generate<br>pBBR1MCS1-FLAG- <i>hns</i>                     |

|                                     |                                                                |                                     |
|-------------------------------------|----------------------------------------------------------------|-------------------------------------|
| FLAG- <i>hns</i> -R                 | GGTGGCGGCCGCTCTAGAAGTGGATCCTTATTCCCT<br>TGATCAGGAAATCTTC       |                                     |
| <i>ycgR</i> -F                      | ACTGGTGGACAGCAAATGGGTCGCGGATCCGTGAGTG<br>GTTACAATGAGCAGTTCC    | To generate                         |
| <i>ycgR</i> -R                      | GTGGTGGTGCCTCGAGTGC GGCCGCAAGCTTTTATTCTC<br>GCACTTTATTTCGCTCTT | pET28a- <i>ycgR</i>                 |
| <i>stpA</i> -F                      | ACTGGTGGACAGCAAATGGGTCGCGGATCCATGAATTT<br>GATGTTACAGAACTTAA    | To generate                         |
| <i>stpA</i> -R                      | GTGGTGGTGCCTCGAGTGC GGCCGCAAGCTTTTAGATTA<br>AGAAATCATCCAGAGAT  | pET28a- <i>stpA</i>                 |
| <i>stpA</i> <sup>F98Y</sup> -up-F   | TCTTATTGTGCTGAAATATTCACCTT                                     |                                     |
| <i>stpA</i> <sup>F98Y</sup> -up-R   | TCTTCGCCATTGAAATCAGTATAACGATATTTTGCCGGA<br>C                   | To generate                         |
| <i>stpA</i> <sup>F98Y</sup> -down-F | GTCCGGCAAATATCGTTATACTGATTTCAATGGCGAAG<br>A                    | pET28a- <i>stpA</i> <sup>F98Y</sup> |
| <i>stpA</i> <sup>F98Y</sup> -down-R | TTTCCTCATTAGCGGTTTTG                                           |                                     |
| <i>hns</i> -F                       | ACTGGTGGACAGCAAATGGGTCGCGGATCCATGAGCG<br>AAGCACTTAAATTCT       | To generate                         |
| <i>hns</i> -R                       | GTGGTGGTGCCTCGAGTGC GGCCGCAAGCTTTTATTCCCT<br>TGATCAGGAAATCTTC  | pET28a- <i>hns</i>                  |
| <i>hns</i> <sub>ctd</sub> -F        | ACTGGTGGACAGCAAATGGGTCGCGGATCCATGGCAG<br>CTCGTCCGGCTAA         | To generate                         |
| <i>hns</i> <sub>ctd</sub> -R        | GTGGTGGTGCCTCGAGTGC GGCCGCAAGCTTTTATTCCCT<br>TGATCAGGAAATCTTC  | pET28a- <i>hns</i> <sub>ctd</sub>   |
| <i>hns</i> <sup>Y99A</sup> -up-F    | TGATAAAATGTGACCTGACTCCTA                                       |                                     |
| <i>hns</i> <sup>Y99A</sup> -up-R    | TAGTTTCACCGTTTTTCGTCAACAGCGCTATATTTAGCCG<br>GAC                | To generate                         |
| <i>hns</i> <sup>Y99A</sup> -down-F  | GTCCGGCTAAATATAGCGCTGTTGACGAAAACGGTGAA<br>ACTA                 | pET28a- <i>hns</i> <sup>Y99A</sup>  |
| <i>hns</i> <sup>Y99A</sup> -down-R  | ATTGTCCGGCGTTATGTGTT                                           |                                     |
| <i>hns</i> <sup>D101A</sup> -up-F   | CGGTGAGTATCCCCCTG                                              |                                     |
| <i>hns</i> <sup>D101A</sup> -up-R   | CAGGTTTTAGTTTCACCGTTTTTCGGCAACATAGCTATAT<br>TTAGCCG            | To generate                         |
| <i>hns</i> <sup>D101A</sup> -down-F | CGGCTAAATATAGCTATGTTGCCGAAAACGGTGAAACTA<br>AAACCTG             | pET28a- <i>hns</i> <sup>D101A</sup> |
| <i>hns</i> <sup>D101A</sup> -down-R | ATTGTCCGGCGTTATGTGTT                                           |                                     |
| <i>hns</i> <sup>K107A</sup> -up-F   | CAGACGGTGAGTATCCCCC                                            |                                     |
| <i>hns</i> <sup>K107A</sup> -up-R   | CCCTGGCCAGTCCAGGTTGCAGTTTCACCGTTTTTCG                          | To generate                         |
| <i>hns</i> <sup>K107A</sup> -down-F | CGAAAACGGTGAAACTGCAACCTGGACTGGCCAGGG                           | pET28a- <i>hns</i> <sup>K107A</sup> |
| <i>hns</i> <sup>K107A</sup> -down-R | AAAAACCAAAGCGGATGTC                                            |                                     |
| <i>hns</i> <sup>T115A</sup> -up-F   | TCTTTTTTGTCCGGTGCCCT                                           |                                     |
| <i>hns</i> <sup>T115A</sup> -up-R   | TGCTTTTTTGATTACAGCCGGTGCACGACCCTGGCCA                          | To generate                         |
| <i>hns</i> <sup>T115A</sup> -down-F | TGGCCAGGGTGCAGCCGGCTGTAATCAAAAAGCA                             | pET28a- <i>hns</i> <sup>T115A</sup> |
| <i>hns</i> <sup>T115A</sup> -down-R | TGGTTGGCGTGGTTGAAAA                                            |                                     |

|                      |                           |           |
|----------------------|---------------------------|-----------|
| 16S-F                | GAAGGTGTTGTGGTTAATA       | qRT-PCR   |
| 16S-R                | AGTAATTCCGATTAACGCTT      |           |
| <i>clpV</i> -RT-F    | AAAAAATGGGGATTTCAGTC      | qRT-PCR   |
| <i>clpV</i> -RT-R    | CCTGCCACTCCCTTAGC         |           |
| <i>hcp1</i> -RT-F    | GGATGACAAAACAAAAATGAAA    | qRT-PCR   |
| <i>hcp1</i> -RT-R    | ACAATCAGGTCGGTGAAGGTA     |           |
| <i>tae4</i> -RT-F    | ATTCCGTGCTGATGTG          | qRT-PCR   |
| <i>tae4</i> -RT-R    | TCAGGCTTGCCCATAGTA        |           |
| <i>vgrG</i> -RT-F    | AAGAGTGAAGGCGAGATGCT      | qRT-PCR   |
| <i>vgrG</i> -RT-R    | AAACGGGTGGAAAAGGTAAA      |           |
| <i>ssrB</i> -RT-F    | TCCTTGATCTTAGTCTACCTGG    | qRT-PCR   |
| <i>ssrB</i> -RT-R    | CTGCTTTTTAAACATAGCCAT     |           |
| <i>sseA</i> -RT-F    | TAAGGTGAGTCAACAGCTTGC     | qRT-PCR   |
| <i>sseA</i> -RT-R    | TTGTTTTTCCTGACGGTATCT     |           |
| <i>rmbA</i> -RT-F    | TGACAGCGCAGTACGGGT        | qRT-PCR   |
| <i>rmbA</i> -RT-R    | CGTCGAAGATTCGGGAAA        |           |
| <i>misL</i> -RT-F    | CAGCATCCTCCTCCAGAAC       | qRT-PCR   |
| <i>misL</i> -RT-R    | TCGCCCGCCATAGTAATA        |           |
| <i>slsA</i> -RT-F    | CTGGCTAAGATCGCCACCTT      | qRT-PCR   |
| <i>slsA</i> -RT-R    | CGCTTTTACCGCTTGACAAAA     |           |
| <i>pipA</i> -RT-F    | ACTTCAAACCTTCAGAAGGCAG    | qRT-PCR   |
| <i>pipA</i> -RT-R    | GGTATATTCGACAACAGGGC      |           |
| <i>pipB</i> -RT-F    | AGTAAACATAATATACAACAGCCT  | qRT-PCR   |
| <i>pipB</i> -RT-R    | AACACAAATTTGCACCG         |           |
| <i>stpA</i> -RT-F    | CTTAAATAATATCCGCACGC      | qRT-PCR   |
| <i>stpA</i> -RT-R    | CCATTGAAATCAGTAAAACG      |           |
| <i>ropS</i> -RT-F    | ACAATCGAACGGGCGATC        | qRT-PCR   |
| <i>ropS</i> -RT-R    | CGGGGTGTCTACCGAGGTA       |           |
| <i>phoP</i> -RT-F    | GGCGCAGCAGTGATGTTT        | qRT-PCR   |
| <i>phoP</i> -RT-R    | AAGCGTTTCCATAATGGTGTAT    |           |
| <i>phoQ</i> -RT-F    | TTCCATGAAATTGAAACCAA      | qRT-PCR   |
| <i>phoQ</i> -RT-R    | TATACGAACCAGCTCCACAC      |           |
| <i>fimA</i> -RT-F    | GTGCCTTTCTCCATCGTCC       | qRT-PCR   |
| <i>fimA</i> -RT-R    | CAGCGTATTGGTGCCTTCA       |           |
| <i>yaiU</i> -RT-F    | CTTTTGGCACAGGTCACTTT      | qRT-PCR   |
| <i>yaiU</i> -RT-R    | TATCATCACCATCAGCATCG      |           |
| <i>clpV</i> -ChIP-F  | TCTGTATCATTGTTTTGTTTCGATA | ChIP-qPCR |
| <i>clpV</i> -ChIP-R  | AGTTTCCATGTGTTATGCCTTG    |           |
| <i>vgrG</i> -ChIP-F  | TATTTTCATGGCTCTTGTCAGCAAT | ChIP-qPCR |
| <i>vgrG</i> -ChIP-R  | GGTAGTGA CTCTTTAATACCGGAT |           |
| <i>ssrAB</i> -ChIP-F | TAATTGTAGTCATCGACTGGGTTAT | ChIP-qPCR |



|                                     |                              |                           |
|-------------------------------------|------------------------------|---------------------------|
| <i>ssrAB</i> -ChIP-R                | AATGCTTCCCTCCAGTTGC          |                           |
| <i>sseA</i> -ChIP-F                 | TAGTACGTGAGGTTTGACTCGC       | ChIP-qPCR                 |
| <i>sseA</i> -ChIP-R                 | TCCCCTCCATATACACGATAGA       |                           |
| <i>rmbA</i> -ChIP-F                 | TGTCATGGTTCCTTAAAGCTGTATT    | ChIP-qPCR                 |
| <i>rmbA</i> -ChIP-R                 | CCTGAACGACTCCTGTGCGATG       |                           |
| <i>sIsA</i> -ChIP-F                 | CTGTCATCAGCTTAAAAACGG        | ChIP-qPCR                 |
| <i>sIsA</i> -ChIP-R                 | TTAATTCATTCTTGTGTTGCCTT      |                           |
| <i>pipA</i> -ChIP-F                 | GCCCCTAAGTTTCATTATAAATA      | ChIP-qPCR                 |
| <i>pipA</i> -ChIP-R                 | AACTTCTTATTTCTGACTACAATT     |                           |
| <i>pipB</i> -ChIP-F                 | CTACTCATACTCAACCAAAGCTCTA    | ChIP-qPCR                 |
| <i>pipB</i> -ChIP-R                 | TTTGATTCTTCTTATGGAAGTG       |                           |
| <i>fimA</i> -ChIP-F                 | AGTTTGCGGCTATTTTTTATTT       | ChIP-qPCR                 |
| <i>fimA</i> -ChIP-R                 | GGATTTCCCTTGAATTACACAC       |                           |
| <i>yaiU</i> -ChIP-F                 | AAGTAAATGTGGTTTTAACATTATTCA  | ChIP-qPCR                 |
| <i>yaiU</i> -ChIP-R                 | TTGTCATCCCTCCTCAGGGAC        |                           |
| <i>P<sub>clpV</sub></i> -EMSA-F     | TTTTTATCTTGCTGTTCAATTGATTA   | EMSA                      |
| <i>P<sub>clpV</sub></i> -EMSA-R     | TTCCATGTGTTATGCCTTGTG        |                           |
| <i>P<sub>clpV</sub></i> -EMSA-CK-F  | TGTTTGACAAGGGTGGGATG         | To generate fragment of   |
| <i>P<sub>clpV</sub></i> -EMSA-CK-R  | CAGCGGCAGGTAAGGGAT           | negative control for EMSA |
| <i>P<sub>vgrG</sub></i> -EMSA-F     | TATTGTTATGTTCAATTCCTTATTTA   | EMSA                      |
| <i>P<sub>vgrG</sub></i> -EMSA-R     | CAAAACTCATGGTAGTACTCC        |                           |
| <i>P<sub>vgrG</sub></i> -EMSA-CK-F  | TATTGTTATGTTCAATTCCTTATTTA   | To generate fragment of   |
| <i>P<sub>vgrG</sub></i> -EMSA-CK-R  | CAAAACTCATGGTAGTACTCC        | negative control for EMSA |
| <i>P<sub>fimA</sub></i> -EMSA-F     | CGGCTATTTTTTATTAGCGAAA       | EMSA                      |
| <i>P<sub>fimA</sub></i> -EMSA-R     | ATGTTTCATGGATTTCCCTTGA       |                           |
| <i>P<sub>fimA</sub></i> -EMSA-CK-F  | TACGGCGATTGGTAATACGACT       | To generate fragment of   |
| <i>P<sub>fimA</sub></i> -EMSA-CK-R  | TGCCTTATAGCGTGCGGTAA         | negative control for EMSA |
| <i>P<sub>yaiU</sub></i> -EMSA-F     | TTAATACCTCAGGCACTATATCATTTTA | EMSA                      |
| <i>P<sub>yaiU</sub></i> -EMSA-F     | CAAGAAGGATTATGCGGCG          |                           |
| <i>P<sub>yaiU</sub></i> -EMSA-CK-F  | GGTTCAGATTATATCCTGGATAGTGC   | To generate fragment of   |
| <i>P<sub>yaiU</sub></i> -EMSA-CK-R  | CATTATCAAGTGAAGTTTCAGTTCGT   | negative control for EMSA |
| <i>P<sub>ssrAB</sub></i> -EMSA-F    | TACAATATCAGGATGCTGTCTACA     | EMSA                      |
| <i>P<sub>ssrAB</sub></i> -EMSA-R    | TAATCGATGGTGTTATCATTAGG      |                           |
| <i>P<sub>ssrAB</sub></i> -EMSA-CK-F | AACCCATGCCGGGTTTTACT         | To generate fragment of   |
| <i>P<sub>ssrAB</sub></i> -EMSA-CK-R | ATCCATCATGCAGCGTTACATT       | negative control for EMSA |
| <i>P<sub>sseA</sub></i> -EMSA-F     | AACATTATTTATTATCGTTACCATAAC  | EMSA                      |
| <i>P<sub>sseA</sub></i> -EMSA-R     | GCTATTTTACTTGCCATTTTGA       |                           |
| <i>P<sub>sseA</sub></i> -EMSA-CK-F  | GCTGCGTTTAGTGAATATCGT        | To generate fragment of   |
| <i>P<sub>sseA</sub></i> -EMSA-CK-R  | TATCTCCACCGGGGCTT            | negative control for EMSA |
| <i>P<sub>rmbA</sub></i> -EMSA-F     | ATAGTGACGAAGGCAGCAGA         | EMSA                      |
| <i>P<sub>rmbA</sub></i> -EMSA-R     | AAACTCCTGGAAGACCTAAAAAT      |                           |

|                                    |                             |                           |
|------------------------------------|-----------------------------|---------------------------|
| <i>P<sub>rmbA</sub></i> -EMSA-CK-F | GCGGTTTTATCTTTGTTGAT        | To generate fragment of   |
| <i>P<sub>rmbA</sub></i> -EMSA-CK-R | TTCGTCCACGTTTACTGTTG        | negative control for EMSA |
| <i>P<sub>sisA</sub></i> -EMSA-F    | TTTCAATCAATAATCCTCTC        | EMSA                      |
| <i>P<sub>sisA</sub></i> -EMSA-R    | TGATAGTCACTATCAGTGTTAAAGTCA |                           |
| <i>P<sub>sisA</sub></i> -EMSA-CK-F | GGGTACAAGGTATTTGCGG         | To generate fragment of   |
| <i>P<sub>sisA</sub></i> -EMSA-CK-R | AATCCAGCAGTTCATTATTTTT      | negative control for EMSA |
| <i>P<sub>pipA</sub></i> -EMSA-F    | AGGTAGTCAACATACCCCTACTC     | EMSA                      |
| <i>P<sub>pipA</sub></i> -EMSA-R    | CATACAGGTAACGCTATGATTCA     |                           |
| <i>P<sub>pipA</sub></i> -EMSA-CK-F | ACAGATTAATACCTCAAAGCGG      | To generate fragment of   |
| <i>P<sub>pipA</sub></i> -EMSA-CK-R | GGATAGTTCATCGTAGCATTGG      | negative control for EMSA |
| <i>P<sub>pipB</sub></i> -EMSA-F    | TTTATTCAATGATGATGAAGCGT     | EMSA                      |
| <i>P<sub>pipB</sub></i> -EMSA-R    | TTCTTATGGAAGTGAGCCGAC       |                           |
| <i>P<sub>pipB</sub></i> -EMSA-CK-F | TTTGGAATGTATGTGCGAATGTTA    | To generate fragment of   |
| <i>P<sub>pipB</sub></i> -EMSA-CK-R | CAAGTCAGGTCTGCGTGAGT        | negative control for EMSA |

**\*Underlined sites indicate restriction enzyme cutting sites added for cloning.**

## Supplementary References

1. Li, S. et al. Autoinducer-2 and bile salts induce c-di-GMP synthesis to repress the T3SS via a T3SS chaperone. *Nat Commun.* **13**, 6684 (2022).
2. Simon, R., Priefer, U. & Puhler, A. A broad host range mobilization system for in vivo genetic engineering: transposon mutagenesis in gram negative bacteria. *Nat. Biotechnol.* **1**, 784–791 (1983).
3. Jiang, Y. et al. Multigene editing in the *Escherichia coli* genome via the CRISPR-Cas9 system. *Appl. Environ. Microbiol.* **81**, 2506–2514 (2015).
4. Zhang, L. et al. The catabolite repressor/activator Cra is a bridge connecting carbon metabolism and host colonization in the plant drought resistance-promoting bacterium *Pantoea alhagi* LTYR-11Z. *Appl. Environ. Microbiol.* **84**, e00054-18 (2018).
5. Schäfer, A. et al. Small mobilizable multi-purpose cloning vectors derived from the *Escherichia coli* plasmids pK18 and pK19: selection of defined deletions in the chromosome of *Corynebacterium glutamicum*. *Gene* **145**, 69–73 (1994).
6. Zhao, Y. & Shao, F. The NAIP-NLRC4 inflammasome in innate immune detection of bacterial flagellin and type III secretion apparatus. *Immunol. Rev.* **265**, 85–102 (2015).
7. Hu, Y. et al. OmpR positively regulates urease expression to enhance acid survival of *Yersinia pseudotuberculosis*. *Microbiology* **155**, 2522–2531 (2009).
8. Kovach, M. E. et al. Four new derivatives of the broad-host-range cloning vector pBBR1MCS, carrying different antibiotic-resistance cassettes. *Gene* **166**, 175–176 (1995).
