# Supplementary material for: c-di-GMP inhibits the DNA binding activity of H-NS in Salmonella
Source: PubMed Central journal article supplement (PMC10657408; doi:10.1038/s41467-023-43442-5), 2023-11-18
Supplement: 41467_2023_43442_MOESM3_ESM.pdf [file 41467_2023_43442_MOESM3_ESM.pdf]

## Description of Additional Supplementary Files:

**Supplementary Data 1:** Differentially expressed genes (absolute  $\log_2$  fold change  $> 1$ , Benjamini–Hochberg adjusted  $p < 0.05$ ) in  $\Delta hns$  or the wild type (WT) overexpressing *adrA* compared to the WT based on RNASeq.
